# Supplementary material for: The shifting burden of mortality among men with HIV in Japan between 2007 and 2024: A single-center retrospective cohort study
Source: Research Square preprint supplement (doi:10.21203/rs.3.rs-7395984/v1), 2025-09-23
Supplement: Supplementary file 1 [file 71a4f895be95e9e18f70dacb.docx]

**The shifting burden of mortality among men with HIV in Japan between 2007 and 2024: A single-center retrospective cohort study**

**Additional file (supplemental tables)**

**Supplemental Table 1.** Causes of death among men with HIV by age group, 2007–2024

**Supplemental Table 2.** Crude mortality rates and standardized mortality ratios (SMR) men with HIV in Japan compared with the general population of men in Japan, including subgroup analyses

**Supplemental Table 3.** Number of deaths and crude mortality rates (per 1,000 person-years) for causes of death other than malignancies, stratified by study period

Supplemental Table 1. Causes of death among men with HIV by age group, 2007–2024

| Age group (years) | 20–39 | 40–64 | ≥65 |
| --- | --- | --- | --- |
| AIDS-related deaths | 8 | 29 | 7 |
| AIDS-related malignancies | 4 | 12 | 4 |
| Non-AIDS-related malignancies | 2 | 33 | 16 |
| Hepatitis C virus | 0 | 4 | 0 |
| Cardiovascular disease | 1 | 10 | 4 |
| Respiratory disease | 0 | 3 | 8 |
| Suicide | 4 | 4 | 1 |
| Others/Unknown | 8 | 50 | 18 |

Supplemental Table 2. Crude mortality rates and standardized mortality ratios (SMR) men with HIV in Japan compared with the general population of men in Japan, including subgroup analyses

|  | Entire period | 2007–2011 | 2012–2016 | 2017–2020 | 2021–2024 |
| --- | --- | --- | --- | --- | --- |
| All causes |  |  |  |  |  |
| Crude mortality rate (/1,000 person-years) | 7.01 | 10.58 | 7.83 | 5.27 | 5.8 |
| SMR (95%CI) | 2.00 (1.75–2.28) | 4.11 (3.11–5.32) | 2.63 (2.06–3.32) | 1.51 (1.11–2.00) | 1.27 (0.95–1.66) |
| **By age group** |  |  |  |  |  |
| Age group: 20–39 years |  |  |  |  |  |
| Crude mortality rate (/1,000 person-years) | 2.86 | 6.16 | 2.14 | 2.19 | 0.46 |
| SMR (95%CI) | 3.9 (2.68–5.48) | 7.28 (4.32–11.51) | 2.93 (1.27–5.78) | 3.36 (1.23–7.32) | 0.68 (0.02–3.77) |
| Age group: 40–64 years |  |  |  |  |  |
| Crude mortality rate (/1,000 person-years) | 7.45 | 12.63 | 10.94 | 4.25 | 5.58 |
| SMR (95%CI) | 2.51 (2.12–2.96) | 3.72 (2.49–5.35) | 3.68 (2.77–4.79) | 1.59 (1.02–2.37) | 1.82 (1.26–2.54) |
| Age group: ≥65 years |  |  |  |  |  |
| Crude mortality rate (/1,000 person-years) | 25.15 | 63.50 | 20.89 | 25.19 | 20.36 |
| SMR (95%CI) | 1.10 (0.83–1.43) | 2.77 (1.33–5.10) | 0.93 (0.43–1.77) | 1.20 (0.71–1.90) | 0.83 (0.49–1.31) |
| Malignancies |  |  |  |  |  |
| Crude mortality rate (/1,000 person-years) | 2.16 | 2.78 | 2.39 | 1.76 | 1.97 |
| SMR (95%CI) | 1.89 (1.47–2.38) | 3.46 (1.94–5.71) | 2.36 (1.48–3.58) | 1.49 (0.85–2.42) | 1.36 (0.81–2.15) |
| **Malignancies by age group** |  |  |  |  |  |
| Age group: 20–39 years |  |  |  |  |  |
| Crude mortality rate (/1,000 person-years) | 0.61 | 1.71 | 0.54 | 0 | 0 |
| SMR (95%CI) | 6.78 (2.72–13.96) | 17.51 (5.68–40.85) | 5.83 (0.71–21.04) | 0.00 (0.00–13.20) | 0.00 (0.00–16.90) |
| Age group: 40–64 years |  |  |  |  |  |
| Crude mortality rate (/1,000 person-years) | 2.36 | 3.48 | 3.18 | 1.59 | 1.97 |
| SMR (95%CI) | 2.6 (1.9–3.48) | 3.15 (1.36–6.20) | 3.22 (1.84–5.23) | 1.98 (0.91–3.76) | 2.28 (1.18–3.98) |
| Age group: ≥65 years |  |  |  |  |  |
| Crude mortality rate (/1,000 person-years) | 8.69 | 12.7 | 9.28 | 9.8 | 6.79 |
| SMR (95%CI) | 0.99 (0.59–1.54) | 1.33 (0.16–4.81) | 1.00 (0.27–2.56) | 1.17 (0.47–2.41) | 0.77 (0.28–1.68) |
| **CD4 count (cells/µL)** |  |  |  |  |  |
| <200 |  |  |  |  |  |
| Crude mortality rate (/1,000 person-years) | 32.52 | 46.01 | 35.25 | 24.65 | 15.15 |
| SMR (95%CI) | 7.48 (6.07–9.13) | 12.76 (9.12–17.38) | 8.47 (5.83–11.89) | 5.62 (3.21–9.13) | 2.59 (1.12–5.11) |
| 200–499 |  |  |  |  |  |
| Crude mortality rate (/1,000 person-years) | 3.47 | 2.65 | 3.33 | 3.31 | 4.42 |
| SMR (95%CI) | 0.91 (0.70–1.16) | 1.08 (0.50–2.05) | 1.06 (0.63–1.68) | 0.82 (0.47–1.32) | 0.82 (0.50–1.26) |
| ≥500 |  |  |  |  |  |
| Crude mortality rate (/1,000 person-years) | 2.94 | 2.77 | 3.55 | 1.67 | 3.68 |
| SMR (95%CI) | 1.05 (0.73–1.47) | 1.28 (0.26–3.74) | 1.55 (0.75–2.86) | 0.65 (0.24–1.41) | 1.05 (0.59–1.74) |
| **HIV viral load (copies/mL)** |  |  |  |  |  |
| <50 |  |  |  |  |  |
| Crude mortality rate (/1,000 person-years) | 4.45 | 4.4 | 5.28 | 3.3 | 4.86 |
| SMR (95%CI) | 1.16 (0.95–1.41) | 1.42 (0.65–2.7) | 1.64 (1.15–2.27) | 0.91 (0.59–1.34) | 1.03 (0.72–1.41) |
| 50–999 |  |  |  |  |  |
| Crude mortality rate (/1,000 person-years) | 6.2 | 9.80 | 8.69 | 3.29 | 1.74 |
| SMR (95%CI) | 1.97 (1.31–2.85) | 3.67 (2.06–6.06) | 2.95 (1.27–5.81) | 1.04 (0.22–3.04) | 0.44 (0.05–1.59) |
| >1000 |  |  |  |  |  |
| Crude mortality rate (/1,000 person-years) | 14.24 | 15.76 | 12.05 | 16.93 | 10.95 |
| SMR (95%CI) | 7.04 (5.36–9.08) | 8.26 (5.49–11.93) | 6.61 (3.85–10.58) | 8.13 (3.90–14.96) | 3.37 (0.92–8.64) |

Supplemental Table 3. Number of deaths and crude mortality rates (per 1,000 person-years) by causes of death other than malignancies, stratified by study period

| Study period | Causes of death | No. of deaths | Crude mortality rate (per 1,000 PY) |
| --- | --- | --- | --- |
| 2007–2011 | AIDS-related death | 19 | 3.53 |
|  | Suicide | 4 | 0.74 |
|  | Cardiovascular disease | 3 | 0.56 |
|  | Liver disease | 3 | 0.56 |
|  | Respiratory disease | 1 | 0.19 |
|  | Unknown/Others | 12 | 2.23 |
| 2012–2016 | AIDS-related death | 16 | 1.74 |
|  | Cardiovascular disease | 3 | 0.33 |
|  | Suicide | 3 | 0.33 |
|  | Respiratory disease | 1 | 0.11 |
|  | Unknown/Others | 27 | 2.94 |
| 2017–2020 | AIDS-related death | 5 | 0.55 |
|  | Cardiovascular disease | 4 | 0.44 |
|  | Suicide | 2 | 0.22 |
|  | Respiratory disease | 2 | 0.22 |
|  | Unknown/Others | 19 | 2.09 |
| 2021–2024 | Respiratory disease | 5 | 0.55 |
|  | Cardiovascular disease | 5 | 0.55 |
|  | AIDS-related death | 4 | 0.44 |
|  | COVID‑19 | 2 | 0.22 |
|  | Liver disease | 1 | 0.11 |
|  | Unknown/Others | 18 | 1.97 |

PY, person-years
